# Supplementary material
Source: Springer Nature journal article supplement (https://www.springermedizin.de/resource/supplementary/13561_2012_37_MOESM5_ESM.pdf/9687280)

Groups of coefficient of homogeneity

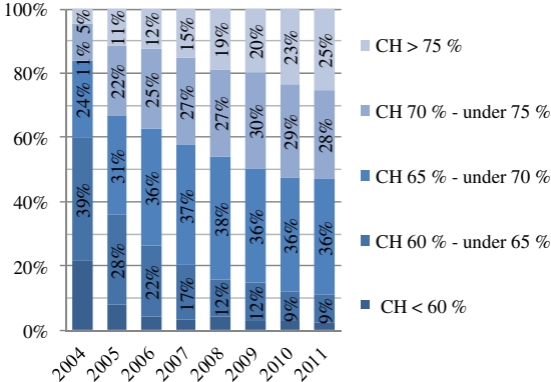

Supplement: MOESM5 [file 9687280]
